# Supplementary material for: The effect of age on DNA methylation in whole blood among Bangladeshi men and women
Source: PubMed Central journal article supplement (PMC6734473; doi:10.1186/s12864-019-6039-9), 2019-09-10
Supplement: 12864_2019_6039_MOESM3_ESM.pdf [file 12864_2019_6039_MOESM3_ESM.pdf]

**Additional File 3.** Number of top 100 age-associated CpGs in common between analysis methods Methylospectrum and RefFreeEWAS

|                    | meth_all | meth_men | meth_women | Ref_all | Ref_men | Ref_women | Horvath Clock CpGs |
|--------------------|----------|----------|------------|---------|---------|-----------|--------------------|
| meth_all           | 100      | 60       | 81         | 0       | 36      | 51        | 3                  |
| meth_men           |          | 100      | 47         | 0       | 38      | 37        | 3                  |
| meth_women         |          |          | 100        | 0       | 28      | 51        | 2                  |
| Ref_all            |          |          |            | 100     | 0       | 0         | 0                  |
| Ref_men            |          |          |            |         | 100     | 32        | 4                  |
| Ref_women          |          |          |            |         |         | 100       | 2                  |
| Horvath Clock CpGs |          |          |            |         |         |           | 100                |
