# Supplementary material for: The effect of age on DNA methylation in whole blood among Bangladeshi men and women
Source: PubMed Central journal article supplement (PMC6734473; doi:10.1186/s12864-019-6039-9), 2019-09-10
Supplement: 12864_2019_6039_MOESM4_ESM.pdf [file 12864_2019_6039_MOESM4_ESM.pdf]

**Additional File Table 4.** Number of top 100 age-associated CpGs in common between different RefFreeEWAS models

|                    | Ref_all* | Ref_all_int` | Ref_men# | Ref_women# | Ref_all_sm^ | Ref_men_sm~ | Ref_women_sm~ | Horvath Clock CpGs |
|--------------------|----------|--------------|----------|------------|-------------|-------------|---------------|--------------------|
| Ref_all*           | 100      | 25           | 34       | 32         | 43          | 36          | 21            | 2                  |
| Ref_all_int`       |          | 100          | 19       | 27         | 31          | 18          | 21            | 2                  |
| Ref_men#           |          |              | 100      | 31         | 25          | 40          | 47            | 3                  |
| Ref_women#         |          |              |          | 100        | 43          | 28          | 39            | 3                  |
| Ref_all_sm^        |          |              |          |            | 100         | 34          | 43            | 2                  |
| Ref_men_sm~        |          |              |          |            |             | 100         | 28            | 5                  |
| Ref_women_sm~      |          |              |          |            |             |             | 100           | 5                  |
| Horvath Clock CpGs |          |              |          |            |             |             |               | 100                |

\* Model factors include sex and age

` Model factors include sex, age, and sex\*age

# Model factors include age

^ Model factors include age, sex, and smoking

~ Model factors include age and smoking
