# Supplementary material for: The effect of age on DNA methylation in whole blood among Bangladeshi men and women
Source: PubMed Central journal article supplement (PMC6734473; doi:10.1186/s12864-019-6039-9), 2019-09-10

Additional File 5. Age distribution for males and females in HEALS

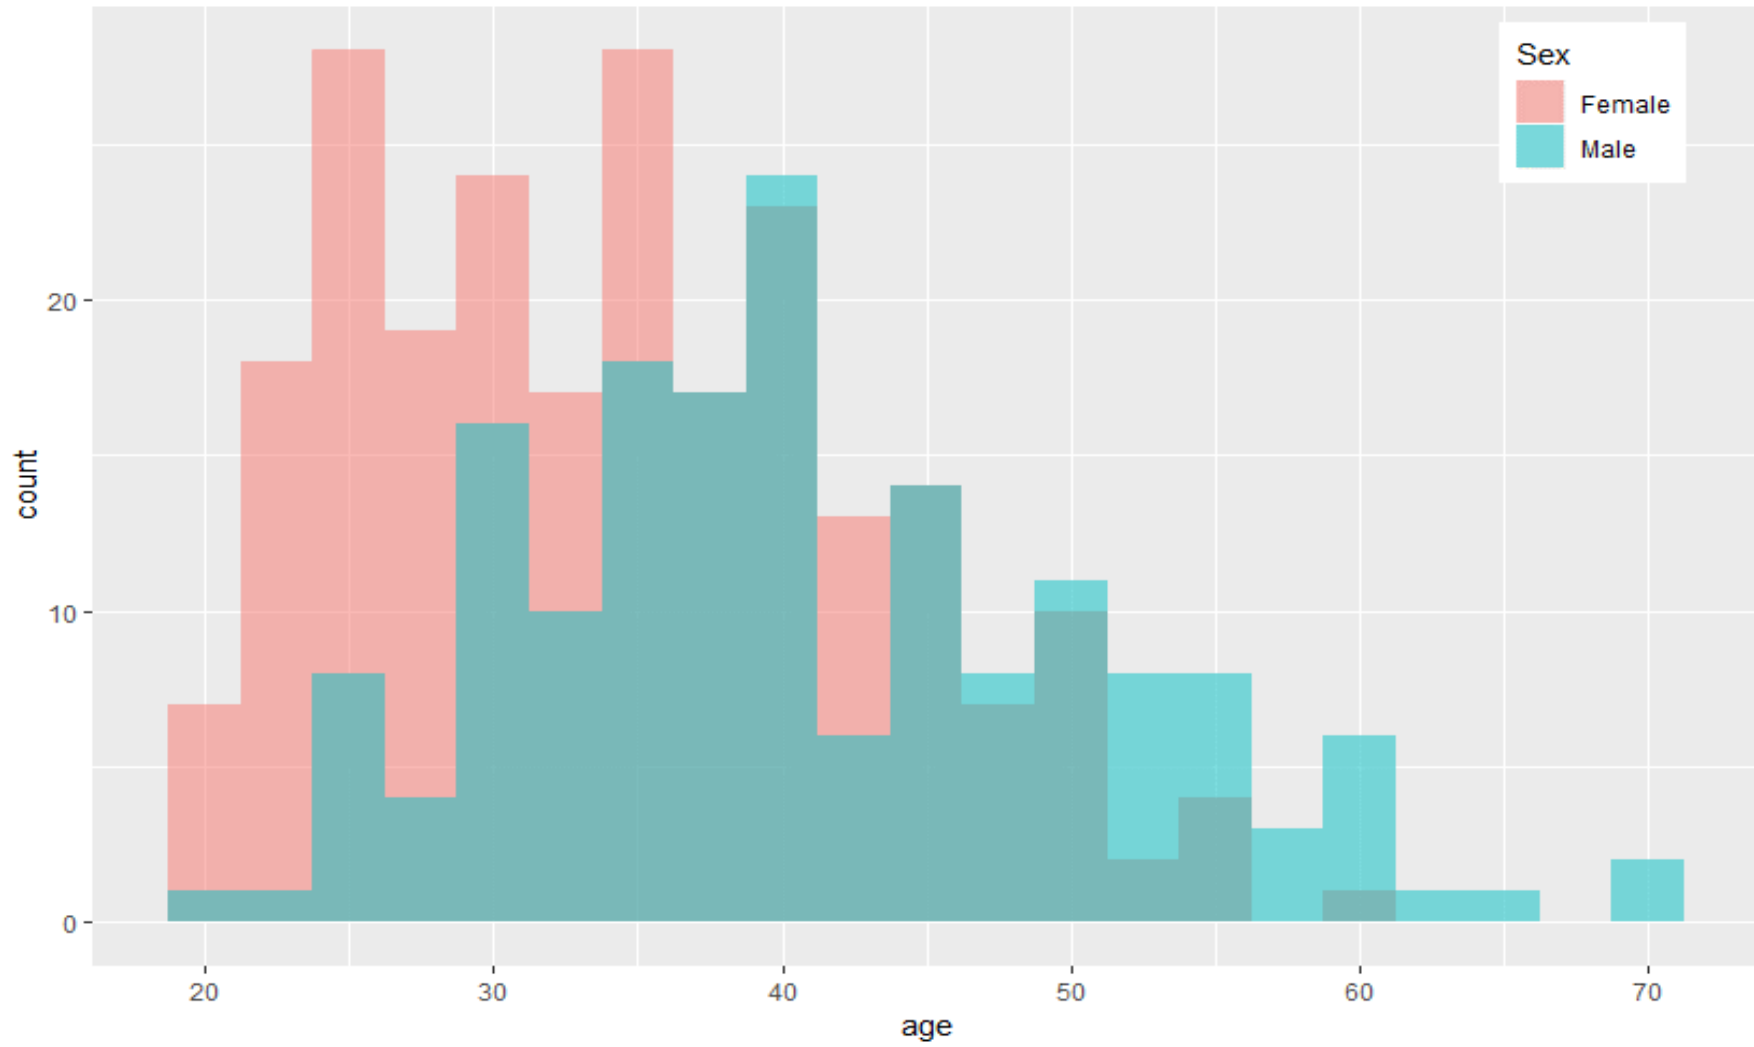

Supplement: 12864_2019_6039_MOESM5_ESM.pdf [file 12864_2019_6039_MOESM5_ESM.pdf]
