# Supplementary material for: The effect of age on DNA methylation in whole blood among Bangladeshi men and women
Source: PubMed Central journal article supplement (PMC6734473; doi:10.1186/s12864-019-6039-9), 2019-09-10
Supplement: 12864_2019_6039_MOESM6_ESM.pdf [file 12864_2019_6039_MOESM6_ESM.pdf]

**Additional File Table 6.** Top 100 results across BEST (original) and HEALS (validation) datasets based on top age-associated CpGs observed in BEST

| CPG.Labels | Original     |          | Men<br>validation |          | beta ratio            |
|------------|--------------|----------|-------------------|----------|-----------------------|
|            | beta         | beta_p   | age_beta          | age_p    | (original/validation) |
| cg00329615 | -0.003889522 | 5.20E-38 | -0.00404076       | 1.89E-10 | 0.962571946           |
| cg16867657 | 0.004175617  | 1.91E-30 | 0.00519592        | 2.76E-49 | 0.803633828           |
| cg21572722 | 0.001748031  | 4.28E-24 | 0.002177773       | 6.18E-57 | 0.802669002           |
| cg07547549 | 0.002312491  | 6.22E-24 | 0.002228514       | 1.75E-26 | 1.037682905           |
| cg04875128 | 0.004575238  | 1.98E-23 | 0.004741795       | 2.28E-24 | 0.964874767           |
| cg13029847 | 0.00050631   | 3.83E-23 | 0.000599544       | 9.74E-09 | 0.844490955           |
| cg07082267 | -0.001921664 | 3.90E-23 | -0.002087985      | 1.65E-27 | 0.920343622           |
| cg22454769 | 0.003396999  | 1.77E-22 | 0.005235923       | 2.13E-39 | 0.648787033           |
| cg24079702 | 0.002653708  | 4.11E-22 | NA                | NA       | #VALUE!               |
| cg10804656 | 0.002584895  | 4.66E-22 | 0.003107597       | 3.69E-13 | 0.83179855            |
| cg07080372 | -0.001510129 | 6.64E-22 | -0.001378917      | 2.20E-22 | 1.095155499           |
| cg21200656 | 0.001209527  | 8.21E-22 | 0.001187083       | 3.25E-13 | 1.018907018           |
| cg18530551 | 0.000863614  | 1.66E-21 | 0.000421471       | 0.00028  | 2.049048344           |
| cg14361627 | 0.002142517  | 2.58E-21 | NA                | NA       | #VALUE!               |
| cg24125828 | 0.002559125  | 4.52E-20 | 0.003318505       | 2.52E-22 | 0.771168052           |
| cg10501210 | -0.006143167 | 4.63E-20 | -0.005842812      | 3.38E-36 | 1.051405824           |
| cg11693709 | -0.002757297 | 1.10E-19 | -0.002493463      | 2.66E-10 | 1.105810321           |
| cg03555227 | 0.001014472  | 1.57E-19 | 0.001149691       | 4.88E-10 | 0.882386516           |
| cg06639320 | 0.002394802  | 2.01E-19 | 0.003909853       | 2.09E-38 | 0.612504401           |
| cg02153528 | -0.000789892 | 2.37E-19 | -0.000973744      | 5.20E-21 | 0.811191194           |
| cg16166796 | 0.000550088  | 2.41E-19 | 0.000591041       | 7.16E-05 | 0.930711332           |
| cg24627299 | -0.001826906 | 2.50E-19 | -0.001501294      | 3.14E-06 | 1.216887636           |
| cg00343092 | -0.001466593 | 2.56E-19 | -0.000922729      | 1.67E-06 | 1.589407446           |
| cg07553761 | 0.002769141  | 2.83E-19 | 0.004710469       | 3.72E-24 | 0.58786952            |
| cg01620164 | -0.007188427 | 9.44E-19 | -0.009732436      | 3.76E-16 | 0.738605089           |
| cg02650266 | 0.001304526  | 1.23E-18 | 0.001555106       | 1.14E-08 | 0.838866578           |
| cg16419235 | 0.001344601  | 2.01E-18 | 0.001850532       | 2.35E-11 | 0.726602652           |
| cg10149533 | -0.002057843 | 6.00E-18 | NA                | NA       | #VALUE!               |
| cg03149128 | 0.001992724  | 6.40E-18 | 0.002045558       | 4.06E-13 | 0.974171261           |
| cg03200166 | 0.001371903  | 1.59E-17 | 0.001028424       | 6.11E-06 | 1.333985727           |
| cg13954457 | 0.001903465  | 1.80E-17 | 0.001809919       | 3.50E-07 | 1.051684756           |
| cg07502389 | 0.00105965   | 1.85E-17 | 0.001544254       | 2.46E-17 | 0.68618923            |
| cg02447229 | 0.000720962  | 2.13E-17 | 0.00049958        | 0.00026  | 1.443136321           |
| cg09809672 | -0.002795356 | 4.51E-17 | -0.002556365      | 2.51E-06 | 1.093488513           |
| cg25256723 | -0.001590412 | 5.34E-17 | -0.001533304      | 3.12E-18 | 1.037245483           |
| cg08426733 | -0.000938279 | 7.84E-17 | -0.000868145      | 1.01E-14 | 1.080786281           |
| cg20052760 | -0.002025233 | 7.87E-17 | -0.002134225      | 6.89E-15 | 0.948931454           |
| cg24892069 | -0.003566066 | 1.04E-16 | -0.00452439       | 5.04E-12 | 0.788187285           |
| cg17816908 | 0.000767015  | 1.39E-16 | NA                | NA       | #VALUE!               |
| cg10010533 | 0.001166007  | 2.10E-16 | 0.001522934       | 7.20E-05 | 0.765632275           |
| cg19722847 | -0.001195731 | 2.22E-16 | -0.000858212      | 1.19E-07 | 1.39328252            |

|            |              |          |              |          |             |
|------------|--------------|----------|--------------|----------|-------------|
| cg22796704 | -0.002812787 | 2.39E-16 | -0.00299745  | 2.51E-18 | 0.93839304  |
| cg13327545 | 0.001659135  | 2.40E-16 | 0.001963005  | 4.73E-20 | 0.845201447 |
| cg18026631 | 0.001063364  | 3.12E-16 | 0.000473162  | 0.00011  | 2.247355142 |
| cg04940570 | 0.001432174  | 3.46E-16 | 0.001791522  | 1.53E-06 | 0.799417297 |
| cg05213896 | 0.003030432  | 3.99E-16 | 0.003309315  | 1.57E-21 | 0.915727848 |
| cg11176990 | 0.000665883  | 4.52E-16 | 0.000846991  | 5.10E-22 | 0.786174628 |
| cg22620090 | 0.00132427   | 4.76E-16 | 0.000397552  | 0.00083  | 3.331063206 |
| cg21874213 | -0.001134905 | 6.85E-16 | -0.001189582 | 6.98E-13 | 0.954036308 |
| cg03473532 | -0.002077605 | 1.24E-15 | -0.002422296 | 4.91E-14 | 0.857700781 |
| cg24724428 | 0.002414545  | 1.26E-15 | 0.002861908  | 3.81E-21 | 0.843683634 |
| cg19935040 | 0.003438105  | 1.42E-15 | 0.003664568  | 2.72E-17 | 0.938202091 |
| cg00046625 | 0.000533126  | 1.42E-15 | 0.0005624    | 0.02662  | 0.94794869  |
| cg14757228 | 0.001902497  | 1.68E-15 | 0.000965275  | 3.37E-07 | 1.970937595 |
| cg24466241 | 0.001944477  | 2.08E-15 | 0.002183951  | 1.99E-08 | 0.890348347 |
| cg15618978 | 0.002394802  | 2.11E-15 | NA           | NA       | #VALUE!     |
| cg23078123 | -0.001887183 | 2.13E-15 | -0.002193527 | 7.30E-18 | 0.860342058 |
| cg07806886 | 0.000824957  | 2.24E-15 | 0.001050542  | 2.60E-08 | 0.785267688 |
| cg26330518 | 0.000612902  | 2.30E-15 | 0.000550235  | 9.58E-11 | 1.113891625 |
| cg12882697 | 0.000642113  | 2.37E-15 | 0.000582893  | 0.00464  | 1.101596133 |
| cg17885226 | 0.001239241  | 3.37E-15 | 0.00182113   | 1.86E-09 | 0.680479395 |
| cg03172991 | -0.001110808 | 4.66E-15 | -0.000906806 | 2.40E-08 | 1.224967106 |
| cg15277914 | -0.002219193 | 5.20E-15 | -0.002028101 | 2.72E-06 | 1.094222147 |
| cg23500537 | 0.001801054  | 5.21E-15 | 0.002464404  | 2.36E-27 | 0.730827131 |
| cg15222899 | 0.000996248  | 5.30E-15 | 0.001425546  | 5.16E-11 | 0.698853434 |
| cg06879746 | -0.001811449 | 5.48E-15 | -0.002308805 | 2.10E-17 | 0.784583089 |
| cg22897615 | 0.002208961  | 6.65E-15 | 0.002128207  | 5.74E-11 | 1.03794497  |
| cg14979593 | -0.001106355 | 7.08E-15 | -0.000895387 | 3.02E-06 | 1.235615694 |
| cg03431918 | -0.001263115 | 7.25E-15 | -0.001132292 | 2.47E-17 | 1.115538814 |
| cg13472192 | 0.001197778  | 7.90E-15 | 0.001453155  | 6.06E-05 | 0.824260152 |
| cg23174607 | 0.001139877  | 8.16E-15 | 0.001432901  | 1.15E-17 | 0.795503314 |
| cg18473521 | 0.002614597  | 8.57E-15 | NA           | NA       | #VALUE!     |
| cg08097417 | 0.001572154  | 8.77E-15 | 0.001864467  | 1.23E-22 | 0.843218819 |
| cg06708720 | -0.001075121 | 1.07E-14 | -0.001444722 | 1.23E-23 | 0.744171676 |
| cg09401099 | 0.001577684  | 1.10E-14 | 0.002774919  | 3.06E-27 | 0.568551277 |
| cg11649376 | -0.001539249 | 1.13E-14 | -0.002290787 | 1.24E-24 | 0.671930211 |
| cg07850154 | -0.002320786 | 1.38E-14 | -0.002267791 | 1.11E-15 | 1.023368642 |
| cg02900766 | 0.000893151  | 1.43E-14 | 0.001126034  | 1.94E-12 | 0.793182803 |
| cg05406635 | 0.001249836  | 1.51E-14 | 0.000975756  | 0.00308  | 1.280890217 |
| cg10290276 | 0.000960643  | 1.62E-14 | 0.001280573  | 4.30E-07 | 0.750166638 |
| cg26161329 | 0.001367739  | 1.66E-14 | 0.001460683  | 2.11E-08 | 0.936369995 |
| cg00573770 | -0.002673538 | 1.73E-14 | -0.004184884 | 2.77E-16 | 0.638855893 |
| cg23766254 | 0.00355536   | 1.92E-14 | 0.003397958  | 3.96E-08 | 1.046322614 |
| cg20273670 | 0.002593137  | 2.10E-14 | NA           | NA       | #VALUE!     |
| cg08262002 | -0.001790739 | 2.51E-14 | -0.002368363 | 1.36E-12 | 0.756108253 |
| cg06900164 | 0.001688845  | 2.83E-14 | NA           | NA       | #VALUE!     |
| cg00884093 | 0.001038202  | 2.93E-14 | 0.001765664  | 9.33E-05 | 0.587995056 |
| cg17621438 | -0.002063905 | 2.97E-14 | -0.002233283 | 8.46E-16 | 0.924157131 |

|            |              |          |              |          |             |
|------------|--------------|----------|--------------|----------|-------------|
| cg01153166 | 0.000736672  | 3.42E-14 | 0.000919172  | 5.61E-11 | 0.801451911 |
| cg03354992 | 0.001442555  | 3.63E-14 | 0.001565807  | 4.51E-10 | 0.921285354 |
| cg19283806 | -0.003404952 | 3.69E-14 | -0.003666474 | 1.58E-42 | 0.928672214 |
| cg19560758 | 0.000786572  | 4.01E-14 | 0.001298945  | 2.66E-11 | 0.605546681 |
| cg14692377 | 0.001503635  | 4.26E-14 | 0.001666965  | 1.94E-10 | 0.902019508 |
| cg17430979 | -0.002561356 | 4.45E-14 | -0.00220592  | 1.17E-08 | 1.161128406 |
| cg00309133 | -0.000895361 | 4.47E-14 | -0.000722615 | 4.05E-06 | 1.23905726  |
| cg12934382 | 0.004227595  | 4.55E-14 | 0.005015185  | 7.64E-16 | 0.842958904 |
| cg25371036 | -0.001528694 | 4.62E-14 | -0.001457243 | 1.87E-13 | 1.049031791 |
| cg20438306 | 0.001033176  | 5.20E-14 | NA           | NA       | #VALUE!     |
| cg16932827 | -0.001846822 | 5.86E-14 | -0.001569547 | 1.65E-14 | 1.176659413 |
| cg01282174 | -0.002217035 | 6.25E-14 | -0.002043915 | 8.07E-13 | 1.084700531 |

| CPG.Labels | Original     |          | Women validation |          | beta ratio            |
|------------|--------------|----------|------------------|----------|-----------------------|
|            | beta         | beta_p   | age_beta         | age_p    | (original/validation) |
| cg16867657 | 0.004344869  | 1.49E-71 | 0.005746044      | 1.24E-56 | 0.756149669           |
| cg26685941 | -0.002557017 | 4.91E-48 | -0.002359223     | 9.54E-19 | 1.083838276           |
| cg14361627 | 0.002373758  | 1.12E-47 | NA               | NA       | #VALUE!               |
| cg19283806 | -0.003513585 | 1.48E-46 | -0.003288239     | 5.63E-21 | 1.068531098           |
| cg10501210 | -0.007049714 | 3.27E-46 | -0.005694818     | 8.47E-35 | 1.23791742            |
| cg12757011 | 0.001269443  | 1.99E-45 | 0.0017729        | 3.36E-37 | 0.7160259             |
| cg07553761 | 0.002858581  | 4.87E-42 | 0.003773494      | 1.60E-16 | 0.757542292           |
| cg07082267 | -0.002169028 | 1.33E-41 | -0.00207837      | 7.32E-29 | 1.043619365           |
| cg22454769 | 0.004193351  | 2.43E-40 | 0.004278266      | 1.93E-31 | 0.980151949           |
| cg16181396 | 0.001072671  | 5.47E-40 | 0.001638342      | 2.07E-27 | 0.654729534           |
| cg24079702 | 0.00305635   | 6.81E-40 | NA               | NA       | #VALUE!               |
| cg00481951 | 0.001513041  | 1.24E-39 | 0.001683153      | 2.82E-19 | 0.89893283            |
| cg07408456 | -0.001483237 | 1.81E-35 | -0.001313053     | 9.06E-17 | 1.129609592           |
| cg17280346 | 0.00275537   | 1.33E-34 | 0.00159837       | 0.00016  | 1.723862279           |
| cg08097417 | 0.001698813  | 1.36E-34 | 0.001521508      | 1.34E-19 | 1.11653198            |
| cg01763090 | 0.001086387  | 1.69E-34 | 0.000924908      | 4.77E-19 | 1.174588841           |
| cg16312514 | -0.001501899 | 2.75E-34 | -0.001594799     | 4.19E-08 | 0.941748033           |
| cg06493994 | 0.001058359  | 9.45E-34 | 0.001397514      | 1.27E-15 | 0.757315615           |
| cg23744638 | -0.002787714 | 1.61E-33 | -0.001719393     | 1.02E-05 | 1.621335868           |
| cg10137837 | 0.002072286  | 4.31E-33 | 0.001994499      | 1.51E-08 | 1.039000627           |
| cg06784991 | 0.001629848  | 1.15E-32 | 0.002473816      | 1.25E-22 | 0.658839735           |
| cg25410668 | 0.002438088  | 1.28E-32 | 0.002840681      | 5.97E-34 | 0.858276119           |
| cg26161329 | 0.001482569  | 2.01E-32 | 0.001544604      | 1.13E-15 | 0.959837669           |
| cg11220950 | 0.001427245  | 8.01E-32 | 0.002101178      | 1.80E-21 | 0.679259698           |
| cg24430580 | 0.000843139  | 9.95E-32 | 0.000947311      | 4.32E-17 | 0.890034131           |
| cg24724428 | 0.002539763  | 1.82E-31 | 0.003078433      | 5.37E-21 | 0.825017941           |
| cg19344626 | -0.004609419 | 1.85E-31 | -0.003295368     | 3.89E-14 | 1.398757211           |
| cg04266460 | 0.001448352  | 2.14E-30 | 0.001119113      | 4.14E-15 | 1.294197045           |
| cg17110586 | 0.001421701  | 3.45E-30 | 0.001860317      | 2.75E-23 | 0.764224733           |
| cg14674720 | 0.001324651  | 4.76E-30 | 0.001831017      | 1.30E-20 | 0.723450731           |
| cg10778288 | 0.000694576  | 8.01E-30 | 0.000580804      | 3.46E-15 | 1.195886777           |
| cg17760405 | 0.000626231  | 9.56E-30 | 0.000802966      | 0.00013  | 0.779896525           |
| cg20294304 | 0.002913236  | 1.25E-29 | 0.002490846      | 1.22E-13 | 1.169576777           |
| cg04400972 | 0.001320183  | 1.51E-29 | 0.001785925      | 1.85E-19 | 0.7392152             |
| cg04875128 | 0.004402121  | 2.32E-29 | 0.004203694      | 2.30E-29 | 1.047203078           |
| cg19863655 | 0.00159659   | 2.52E-29 | NA               | NA       | #VALUE!               |
| cg05308819 | -0.001527398 | 3.45E-29 | -0.001615308     | 6.92E-22 | 0.945577074           |
| cg21572722 | 0.001618051  | 4.84E-29 | 0.00263524       | 3.58E-38 | 0.614005278           |
| cg25334393 | 0.001751469  | 5.43E-29 | NA               | NA       | #VALUE!               |
| cg11084334 | 0.001674349  | 7.61E-29 | 0.001728016      | 1.06E-41 | 0.968942833           |
| cg03646916 | 0.002357435  | 8.90E-29 | NA               | NA       | #VALUE!               |

|            |              |          |              |          |             |
|------------|--------------|----------|--------------|----------|-------------|
| cg15341124 | 0.001129609  | 1.01E-28 | 0.001580715  | 1.24E-13 | 0.714619289 |
| cg06782035 | 0.001639252  | 1.01E-28 | 0.000688631  | 1.69E-06 | 2.380452014 |
| cg01620164 | -0.008987049 | 1.01E-28 | -0.008097007 | 3.19E-29 | 1.109922402 |
| cg20818778 | 0.000957245  | 2.06E-28 | 0.001091358  | 4.13E-13 | 0.877113681 |
| cg10149533 | -0.00217812  | 2.67E-28 | NA           | NA       | #VALUE!     |
| cg19784428 | -0.003310308 | 2.71E-28 | -0.00240413  | 1.54E-13 | 1.376925964 |
| cg12317815 | -0.002294044 | 3.90E-28 | NA           | NA       | #VALUE!     |
| cg03530962 | -0.001571763 | 4.18E-28 | -0.001510203 | 6.94E-18 | 1.040762812 |
| cg02391713 | 0.001462429  | 5.19E-28 | 0.001591046  | 3.18E-26 | 0.91916216  |
| cg18343474 | 0.000878024  | 8.37E-28 | 0.000956484  | 1.63E-18 | 0.917970541 |
| cg22353329 | 0.001172574  | 8.61E-28 | 0.001501414  | 6.61E-19 | 0.780980146 |
| cg06639320 | 0.002330505  | 8.76E-28 | 0.002970537  | 5.11E-19 | 0.784539921 |
| cg07955995 | 0.001147601  | 1.87E-27 | 0.000622242  | 1.21E-08 | 1.844299116 |
| cg08090640 | -0.001388672 | 3.02E-27 | -0.001048388 | 3.00E-07 | 1.3245783   |
| cg20591472 | 0.001290985  | 3.28E-27 | 0.001883274  | 6.99E-12 | 0.685500135 |
| cg03074925 | 0.000801183  | 3.31E-27 | 0.001028959  | 4.22E-11 | 0.778634878 |
| cg18064714 | 0.001222424  | 5.11E-27 | 0.001698774  | 4.34E-20 | 0.719592177 |
| cg10804656 | 0.002897793  | 5.41E-27 | 0.002995618  | 5.97E-17 | 0.967343717 |
| cg25090514 | 0.00107206   | 8.74E-27 | 0.000759902  | 1.92E-12 | 1.410787956 |
| cg05584950 | -0.001054214 | 8.81E-27 | -0.001236306 | 4.32E-09 | 0.85271239  |
| cg03440125 | 0.001857009  | 2.07E-26 | 0.001940062  | 1.30E-08 | 0.957190639 |
| cg18473521 | 0.003418834  | 2.17E-26 | NA           | NA       | #VALUE!     |
| cg00329615 | -0.004826972 | 3.21E-26 | -0.004851243 | 4.87E-27 | 0.99499707  |
| cg05412028 | -0.00176297  | 4.86E-26 | -0.002304438 | 1.30E-17 | 0.765032455 |
| cg09643544 | 0.000604387  | 5.37E-26 | 0.001103024  | 4.95E-11 | 0.547936119 |
| cg25478614 | 0.001501238  | 5.95E-26 | 0.001647758  | 2.65E-14 | 0.911079298 |
| cg15557036 | 0.001240044  | 6.08E-26 | 0.001483621  | 5.39E-14 | 0.835823095 |
| cg22059812 | 0.000857447  | 7.24E-26 | 0.001409862  | 7.04E-14 | 0.608178139 |
| cg02287710 | 0.001486127  | 7.98E-26 | 0.002009661  | 8.67E-15 | 0.739491451 |
| cg21159778 | 0.002122983  | 8.10E-26 | 0.002375434  | 2.32E-19 | 0.893724525 |
| cg08160331 | 0.002097476  | 8.14E-26 | NA           | NA       | #VALUE!     |
| cg21809447 | 0.000621675  | 9.88E-26 | 0.000770927  | 2.87E-08 | 0.806399105 |
| cg06492796 | -0.001705477 | 1.02E-25 | -0.00095981  | 5.30E-06 | 1.776890326 |
| cg23078123 | -0.002161932 | 1.08E-25 | -0.001863845 | 3.09E-26 | 1.159931538 |
| cg23500537 | 0.001937876  | 1.19E-25 | 0.002226789  | 6.05E-19 | 0.870255693 |
| cg26628907 | -0.001597801 | 1.43E-25 | -0.001744319 | 9.64E-17 | 0.916002873 |
| cg24369989 | 0.001608894  | 1.71E-25 | 0.001672682  | 4.46E-10 | 0.961864891 |
| cg05991454 | 0.001817133  | 2.07E-25 | 0.001822075  | 5.64E-18 | 0.997288004 |
| cg24575083 | 0.000821755  | 2.15E-25 | 0.001239411  | 0.00377  | 0.663020842 |
| cg07547549 | 0.001881939  | 2.53E-25 | 0.002577787  | 2.83E-39 | 0.730060075 |
| cg22620090 | 0.001339591  | 3.15E-25 | 0.000436098  | 7.99E-06 | 3.071768746 |
| cg08957484 | 0.002637604  | 3.62E-25 | 0.002481226  | 6.08E-18 | 1.063024478 |
| cg03607117 | 0.001004499  | 5.18E-25 | 0.000922776  | 2.30E-17 | 1.088562095 |
| cg13806741 | 0.001387567  | 5.26E-25 | 0.001858217  | 6.94E-18 | 0.746719567 |
| cg17885226 | 0.001781157  | 5.27E-25 | 0.001945925  | 2.72E-10 | 0.915326482 |
| cg21867345 | 0.001293886  | 1.16E-24 | 0.001565578  | 1.06E-10 | 0.826458677 |
| cg20249566 | -0.003498521 | 1.23E-24 | -0.002876463 | 9.22E-14 | 1.216257938 |

|            |              |          |              |          |             |
|------------|--------------|----------|--------------|----------|-------------|
| cg24891133 | 0.001639269  | 1.43E-24 | 0.001432986  | 1.74E-09 | 1.143953049 |
| cg23077820 | 0.001438267  | 1.74E-24 | 0.001451517  | 2.22E-10 | 0.990871941 |
| cg11071401 | 0.001762615  | 1.89E-24 | 0.0021864    | 3.79E-30 | 0.806172317 |
| cg22358580 | 0.000915972  | 2.64E-24 | 0.001330991  | 3.27E-13 | 0.688188237 |
| cg12852499 | 0.000605865  | 3.44E-24 | 0.001211803  | 7.59E-12 | 0.499969684 |
| cg19470159 | 0.000413678  | 3.46E-24 | 0.000857233  | 6.44E-08 | 0.482573288 |
| cg09401099 | 0.001678956  | 4.64E-24 | 0.002029457  | 3.36E-21 | 0.827293231 |
| cg01974375 | -0.001217891 | 7.54E-24 | -0.001518651 | 3.51E-19 | 0.801955709 |
| cg21790626 | 0.0009704    | 7.90E-24 | 0.000631343  | 2.31E-05 | 1.537040365 |
| cg04295144 | 0.004285485  | 9.90E-24 | 0.004404946  | 3.14E-44 | 0.972880297 |
| cg09636661 | -0.001685084 | 1.11E-23 | -0.001774273 | 1.66E-13 | 0.949731782 |
| cg17430979 | -0.002422679 | 1.31E-23 | -0.002503325 | 4.60E-11 | 0.967784668 |

---
