# Supplementary material for: The effect of age on DNA methylation in whole blood among Bangladeshi men and women
Source: PubMed Central journal article supplement (PMC6734473; doi:10.1186/s12864-019-6039-9), 2019-09-10
Supplement: 12864_2019_6039_MOESM7_ESM.pdf [file 12864_2019_6039_MOESM7_ESM.pdf]

**Additional File Table 7.** Number of top 91 age-associated CpGs in common between different RefFreeEWAS models using original dataset and a) top 100 age-associated CpGs in Validation dataset or b) significant ( $< 5e-8$ ) age-associated CpGs in the Validation dataset

---

|               | a) | b) |
|---------------|----|----|
| Ref_all*      | 24 | 95 |
| Ref_men#      | 18 | 58 |
| Ref_women#    | 19 | 81 |
| Ref_all_sm^   | 25 | 92 |
| Ref_men_sm~   | 18 | 69 |
| Ref_women_sm~ | 22 | 83 |

\* Model factors include sex and age

# Model factors include age

^ Model factors include age, sex, and smoking

~ Model factors include age and smoking
