# Supplementary material for: The effect of age on DNA methylation in whole blood among Bangladeshi men and women
Source: PubMed Central journal article supplement (PMC6734473; doi:10.1186/s12864-019-6039-9), 2019-09-10
Supplement: 12864_2019_6039_MOESM8_ESM.pdf [file 12864_2019_6039_MOESM8_ESM.pdf]

**Additional File 8.** UCSC genome location information for a subset of the top 100 age-associated CpGs observed to be significantly associated with its Illumina assigned gene expression

> ###Table info. - cpg by expression among males

| ID         | UCSC_RefGene_Name | UCSC_RefGene_Group    | Relation_to_UCSC_CpG_Island |
|------------|-------------------|-----------------------|-----------------------------|
| cg09809672 | EDARADD           | TSS1500;5'UTR;1stExon | N_Shore                     |
| cg12934382 | GRM2              | 1stExon;5'UTR         | Island                      |
| cg24466241 | FAM159A           | Body                  | Island                      |

> ###Table info. - cpg by expression among females

| ID         | UCSC_RefGene_Name    | UCSC_RefGene_Group | Relation_to_UCSC_CpG_Island |
|------------|----------------------|--------------------|-----------------------------|
| cg03646916 | ZNF197               | TSS200             | Island                      |
| cg08160331 | MIR326               | 1stExon            | Island                      |
| cg09636661 | NFAT6                | 1stExon; 5' UTR    | Island                      |
| cg09643544 | ZNF266               | 1stExon;5'UTR      | Island                      |
| cg15557036 | KAT7                 |                    | Island                      |
| cg18473521 | HOXC4                | Body               | S_Shore                     |
| cg21790626 | ZNF671, ZIK1, ZNF814 | 5' UTR; 1stExon    | Island                      |
| cg21867345 | ZNF197               | TSS200             | Island                      |
| cg25334393 | RPL8                 | Body               | Island                      |

> ###Table info. - age interaction

| ID             | UCSC_RefGene_Name       | UCSC_RefGene_Group    | Relation_to_UCSC_CpG_Island |
|----------------|-------------------------|-----------------------|-----------------------------|
| <b>Males</b>   |                         |                       |                             |
| cg09809672     | EDARADD;EDARADD;EDARADD | TSS1500;5'UTR;1stExon | N_Shore                     |
| <b>Females</b> |                         |                       |                             |
| cg03646916     | ZNF197                  | TSS200                | Island                      |
| cg08160331     | MIR326                  | 1stExon               | Island                      |
| cg21867345     | ZNF197                  | TSS200                | Island                      |
